# Supplementary material for: Ultrasonic-induced disorder engineering on ZnO, ZrO2, Fe2O3 and SnO2 nanocrystals
Source: Royal Society of Chemistry journal article supplement (doi:10.1039/c7ra01209h), 2017-01-01
Supplement: c7ra01209h1.pdf [file c7ra01209h1.pdf]

## **Supplementary Information**

### **Ultrasonic-induced disorder engineering on ZnO, ZrO<sub>2</sub>, Fe<sub>2</sub>O<sub>3</sub> and SnO<sub>2</sub> Nanocrystals**

Chenyao Fan, Siqi Yu, Guodong Qian, Zhiyu Wang\*

State Key Laboratory of Silicon Materials, School of Materials Science and engineering,  
Zhejiang University, Zheda Road 38, 310027, Hangzhou, China

## Figures

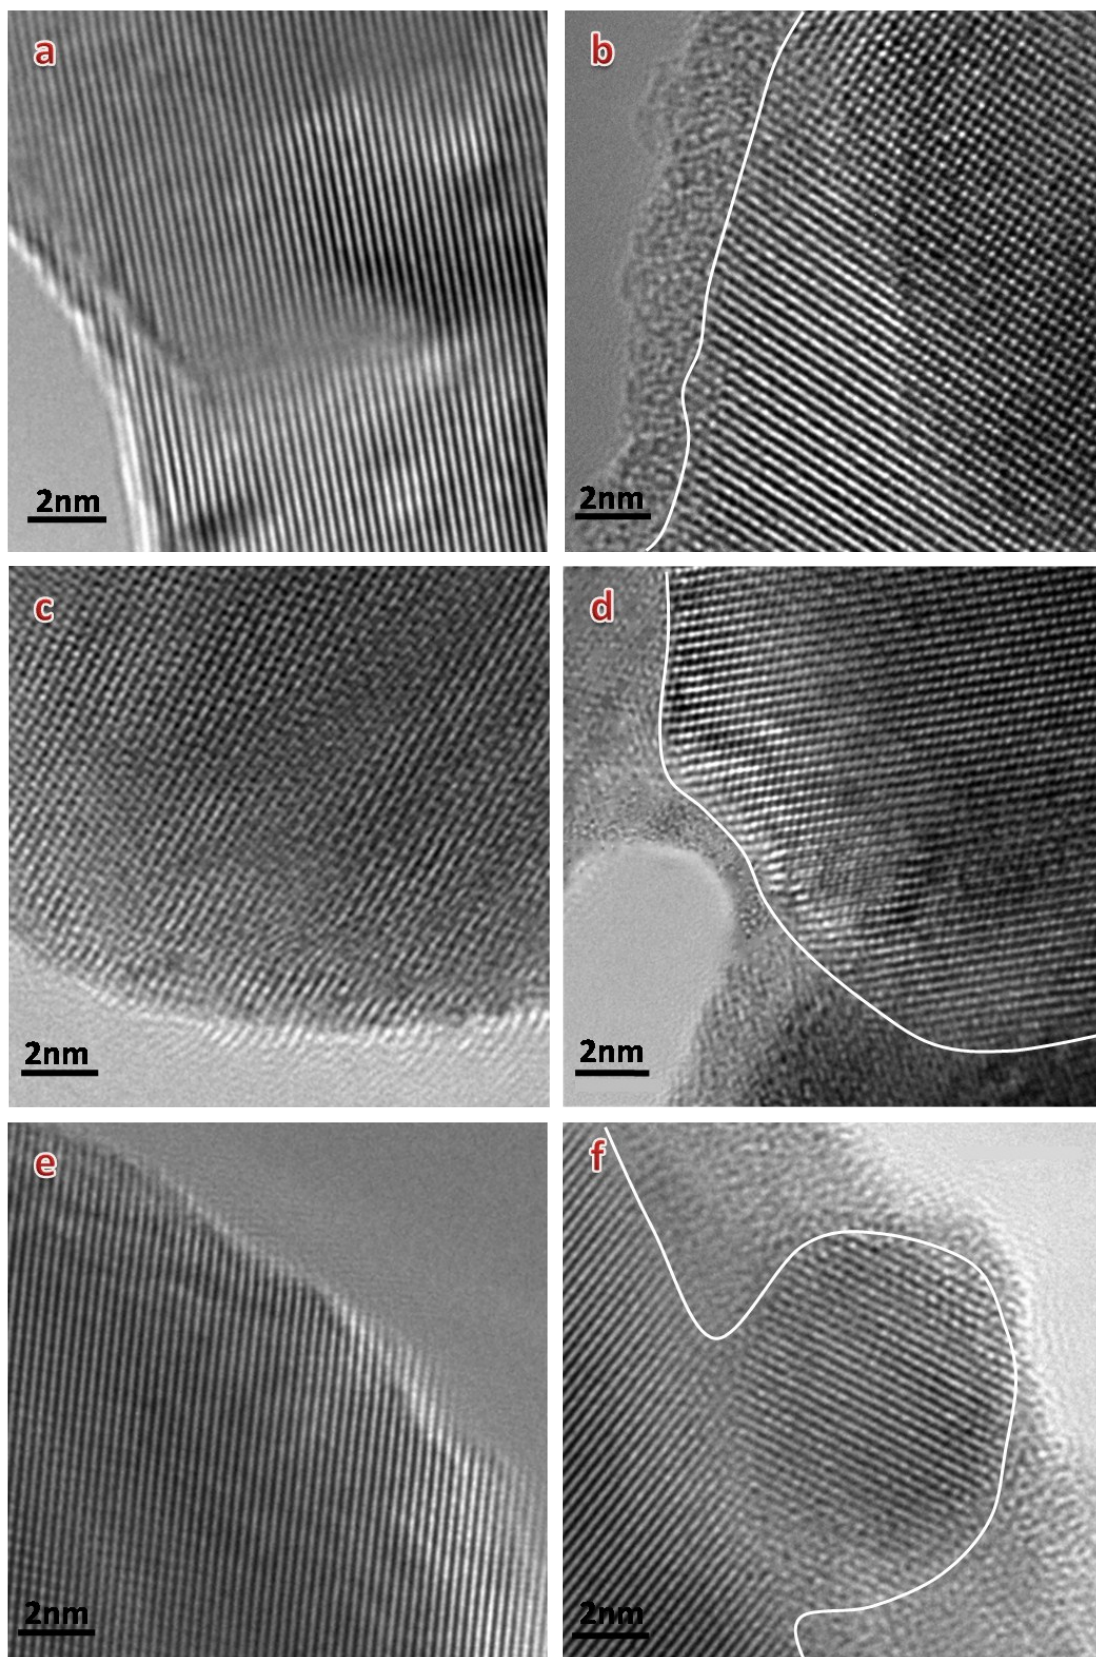

**Figure S1.** HRTEM images of ZnO(a), ZnO-U(b), ZrO<sub>2</sub>(c), ZrO<sub>2</sub>-U(d), SnO<sub>2</sub>(e) and SnO<sub>2</sub>-U(f). The white lines mark the boundaries of crystalline and disorder phase.

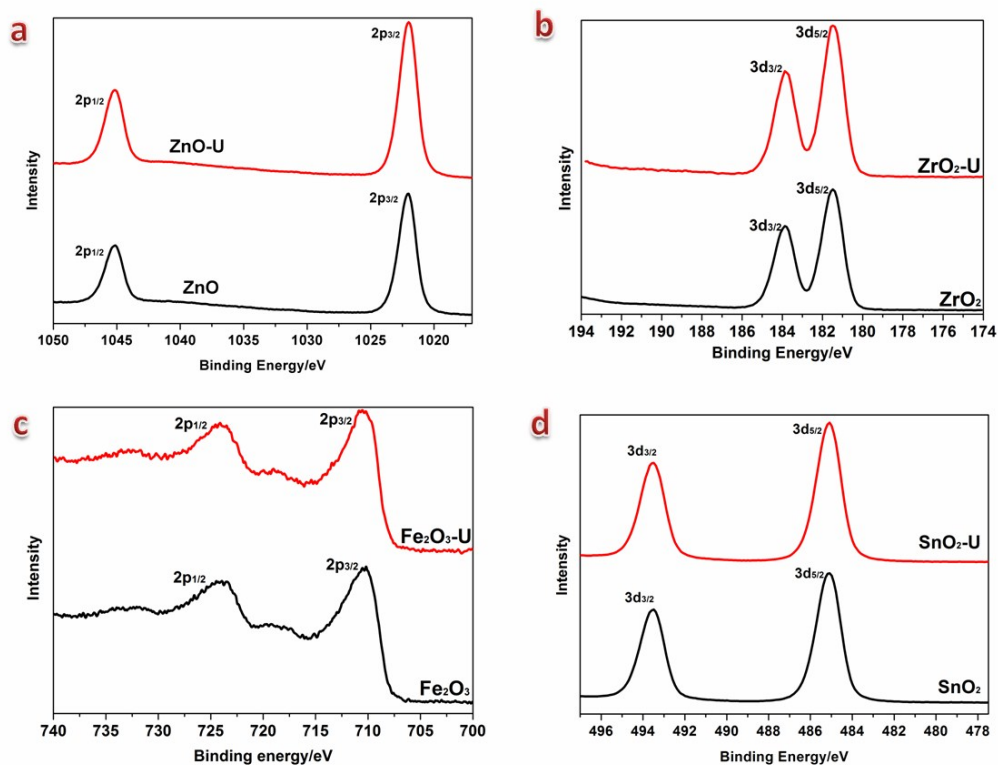

**Figure S2.** Zn 2p XPS spectra of ZnO and ZnO-U(a), Zr 3d XPS spectra of ZrO<sub>2</sub> and ZrO<sub>2</sub>-U(b), Fe 2p XPS spectra of Fe<sub>2</sub>O<sub>3</sub> and Fe<sub>2</sub>O<sub>3</sub>-U(c), Sn 3d XPS spectra of SnO<sub>2</sub> and SnO<sub>2</sub>-U(d).

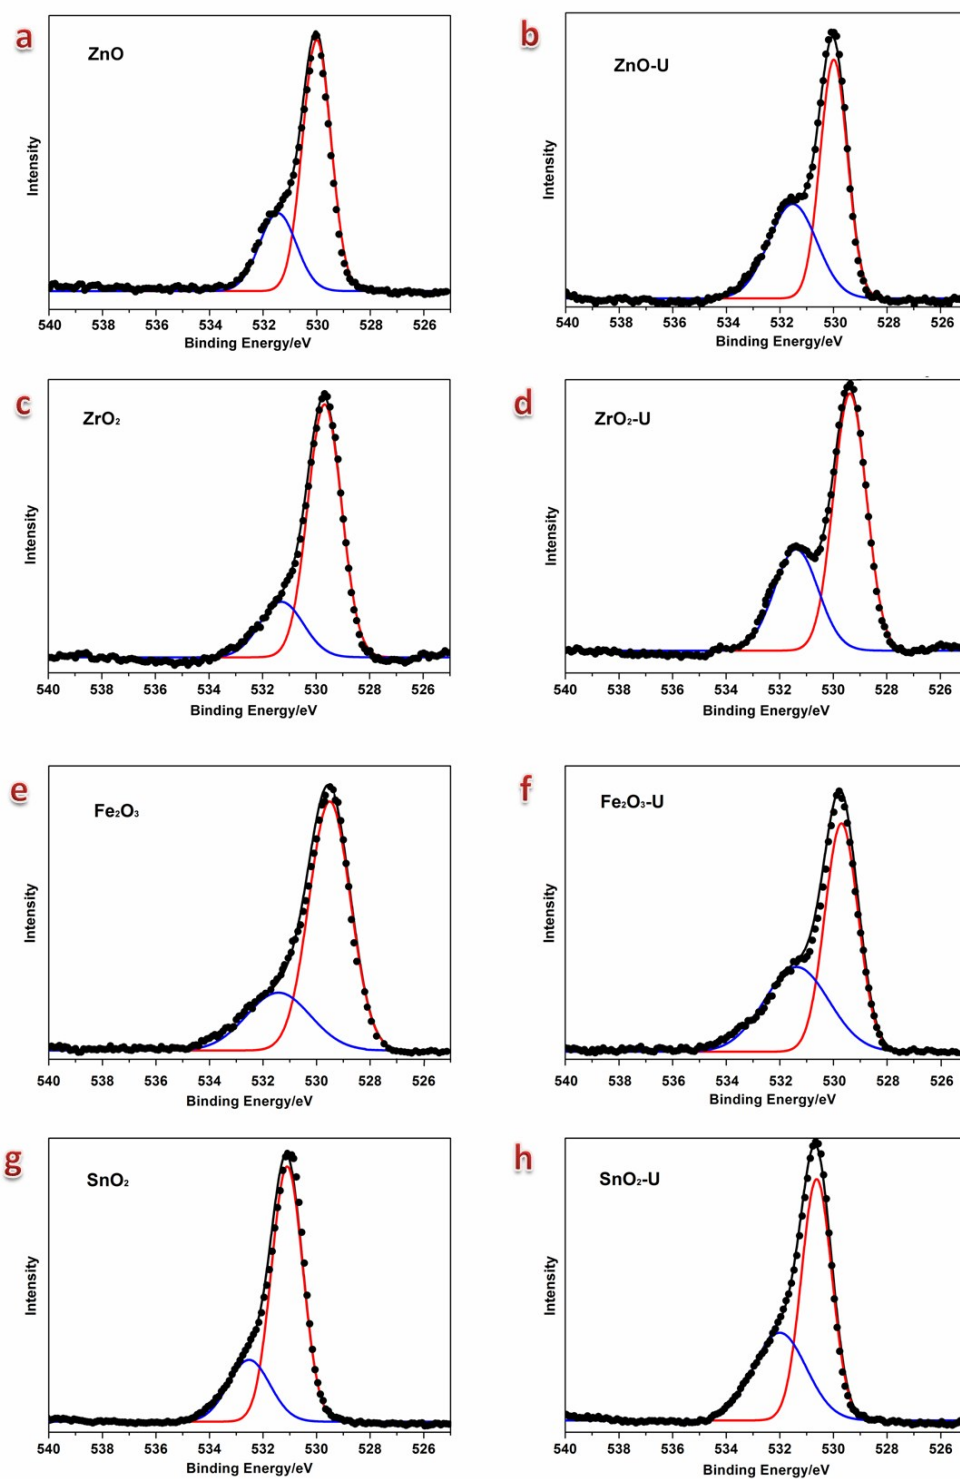

**Figure S3.** O 1s XPS spectra of ZnO, ZrO<sub>2</sub>, Fe<sub>2</sub>O<sub>3</sub>, SnO<sub>2</sub> NCs and the corresponding ultrasonic treated products.

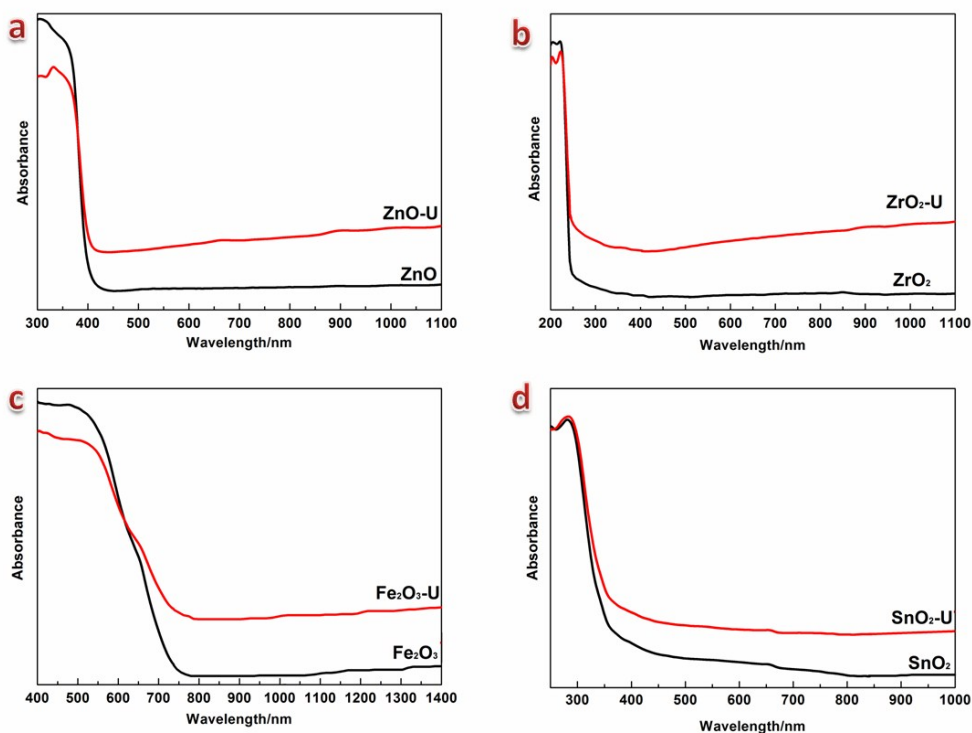

**Figure S4.** UV-Vis spectral absorbance of ZnO, ZrO<sub>2</sub>, Fe<sub>2</sub>O<sub>3</sub>, SnO<sub>2</sub> NCs and the corresponding ultrasonic treated products.

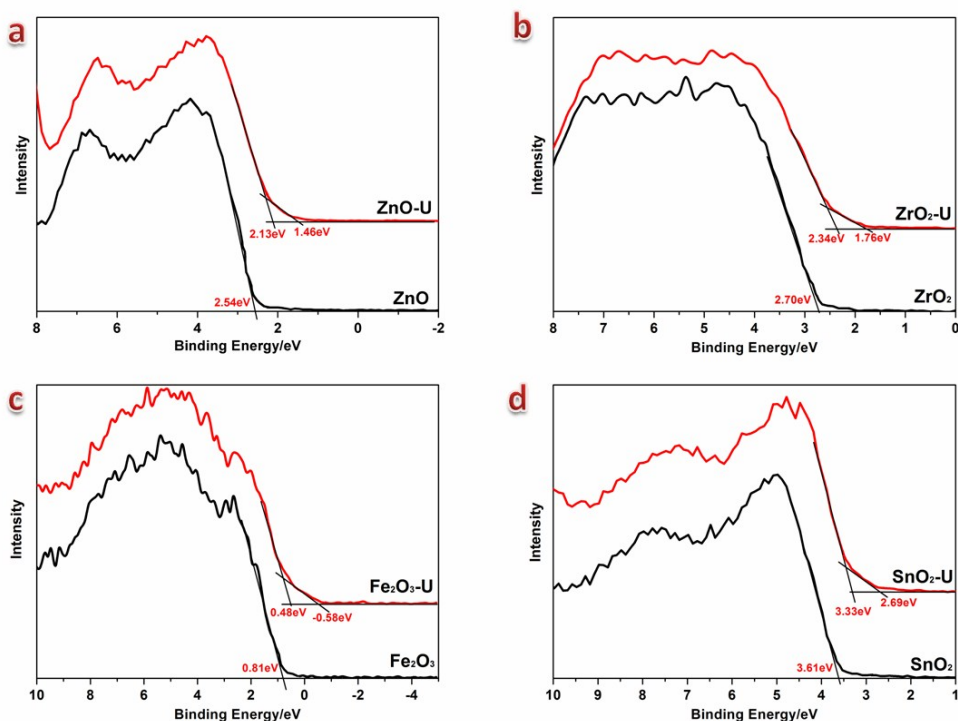

**Figure S5.** VB XPS spectra of ZnO, ZrO<sub>2</sub>, Fe<sub>2</sub>O<sub>3</sub>, SnO<sub>2</sub> NCs and the corresponding ultrasonic treated products. The black lines indicate the VBM and band tail of each sample.

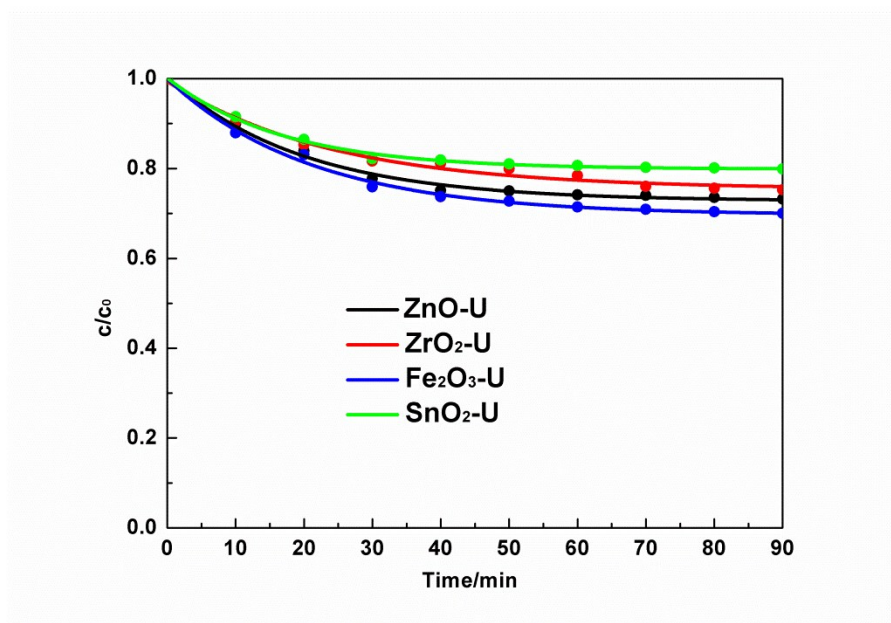

**Figure S6.** Evaluations of dark reaction of ZnO-U, ZrO<sub>2</sub>-U, Fe<sub>2</sub>O<sub>3</sub>-U and SnO<sub>2</sub>-U.

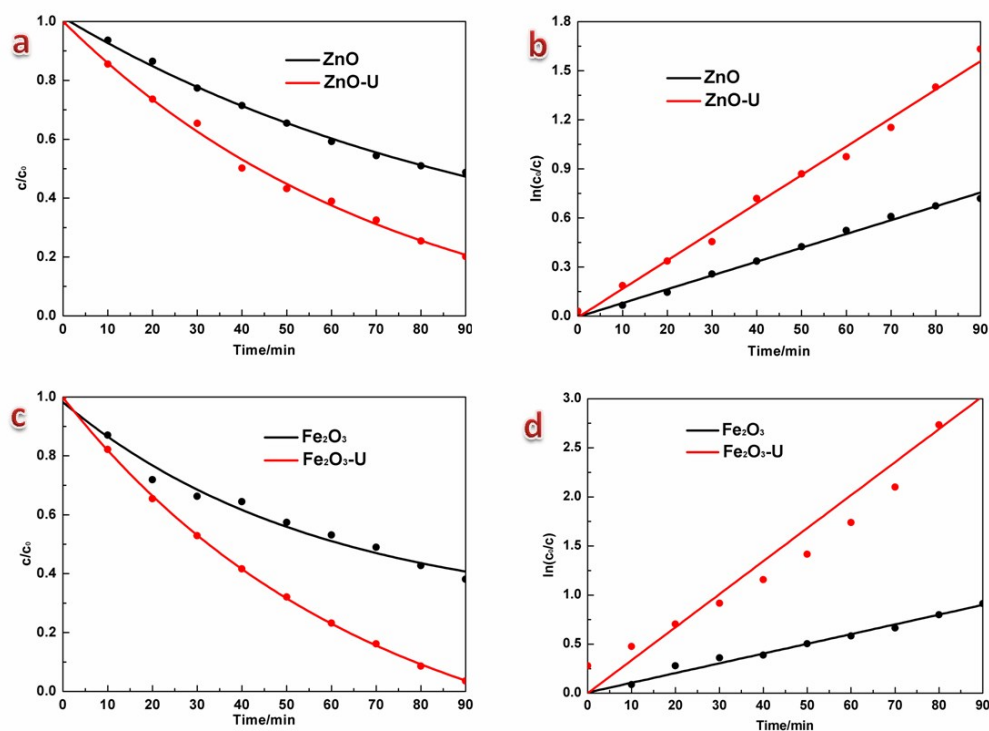

**Figure S7.** Evaluations of visible-light-driven photocatalytic activity (AF degradation) of ZnO, Fe<sub>2</sub>O<sub>3</sub> NCs and the corresponding ultrasonic treated products.

**Table S1.** Kinetic constants ( $k_a$ ) values of solar-driven photocatalysis for ZnO, ZrO<sub>2</sub>, Fe<sub>2</sub>O<sub>3</sub>, SnO<sub>2</sub> NCs and the corresponding ultrasonic-treated products.

| Sample | ZnO | ZnO-U | ZrO <sub>2</sub> | ZrO <sub>2</sub> -U | Fe <sub>2</sub> O <sub>3</sub> | Fe <sub>2</sub> O <sub>3</sub> -U | SnO <sub>2</sub> | SnO <sub>2</sub> -U |
|--------|-----|-------|------------------|---------------------|--------------------------------|-----------------------------------|------------------|---------------------|
|--------|-----|-------|------------------|---------------------|--------------------------------|-----------------------------------|------------------|---------------------|

|                     |       |        |       |       |       |        |       |       |
|---------------------|-------|--------|-------|-------|-------|--------|-------|-------|
| $k_a/10^{-2}s^{-1}$ | 8.955 | 11.416 | 0.837 | 1.199 | 7.699 | 11.241 | 2.163 | 3.755 |
|---------------------|-------|--------|-------|-------|-------|--------|-------|-------|
